# Supplementary material
Source: PubMed Central journal article supplement (PMC7269223)
Supplement: CJN.08900719SupplementaryData.pdf [file CJN.08900719SupplementaryData.pdf]

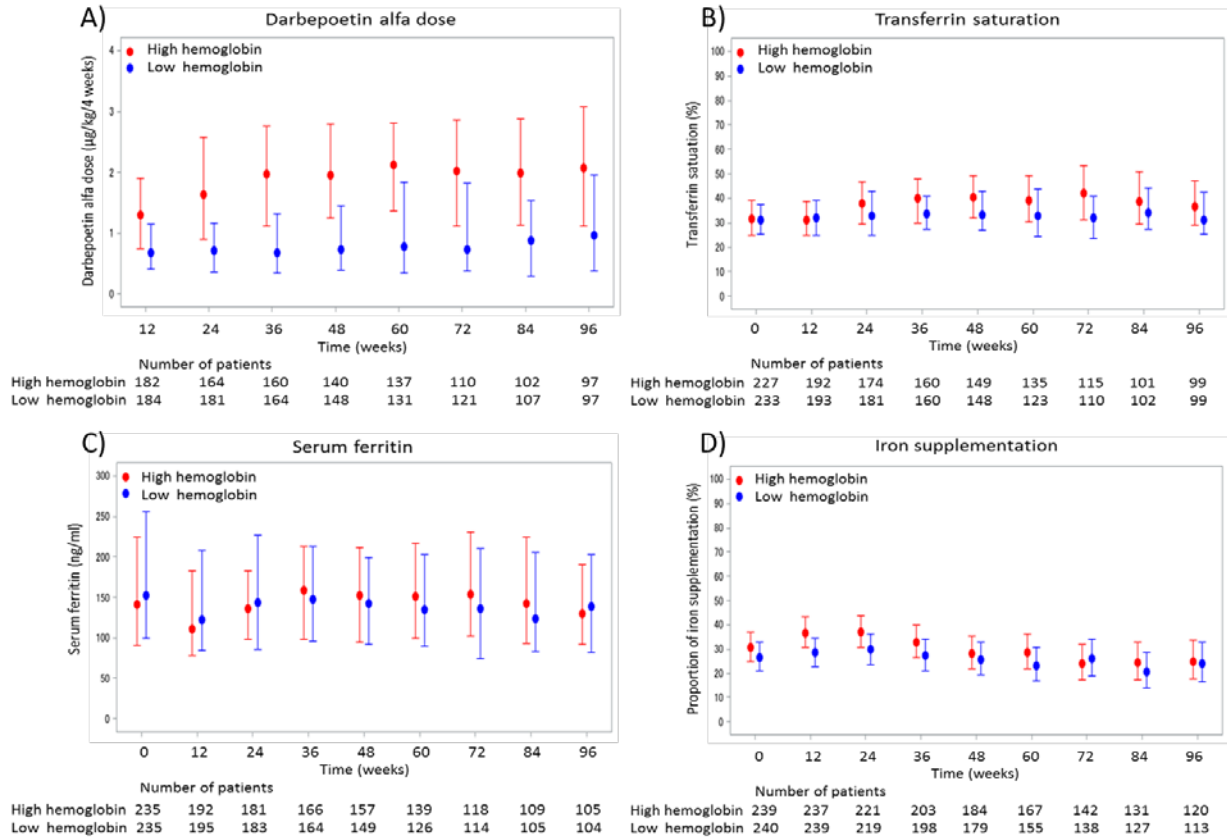

**Supplemental Figure 1. Darbepoetin alfa dose and iron parameters during the study**

**period.** (A) Darbepoetin alfa dose, (B) transferrin saturation, (C) serum ferritin, and (D)

proportion of iron supplementation. Values shown are medians with IQRs for darbepoetin alfa dose, transferrin saturation, and serum ferritin and proportion with 95% confidence interval for iron supplementation. Darbepoetin alfa doses are described as monthly (4 weeks) averaged and body weight- adjusted dose calculated by the quarterly total dose.

Abbreviation: TSAT, transferrin saturation
